# Supplementary material for: Gene expression-based outcome prediction in advanced stage classical Hodgkin lymphoma treated with BEACOPP
Source: PubMed Central journal article supplement (PMC8632672; doi:10.1038/s41375-021-01314-1), 2021-06-10

Supplementary Figure 1

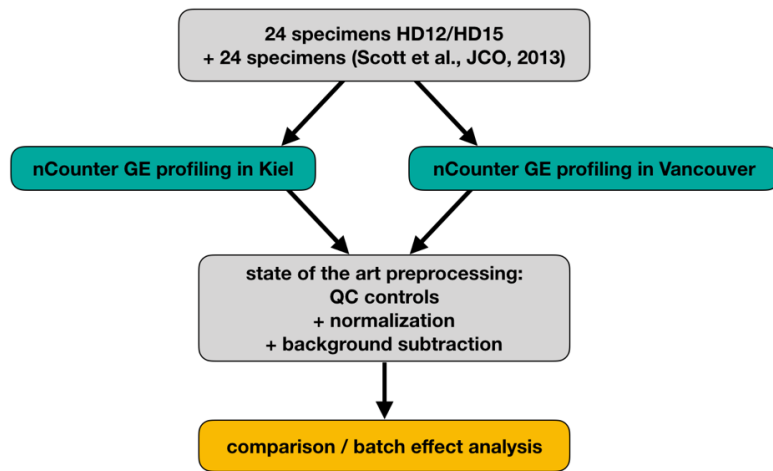

Supplementary Figure 2

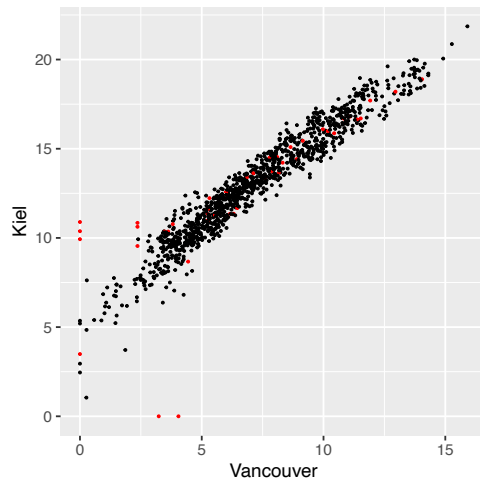

Supplementary Figure 3

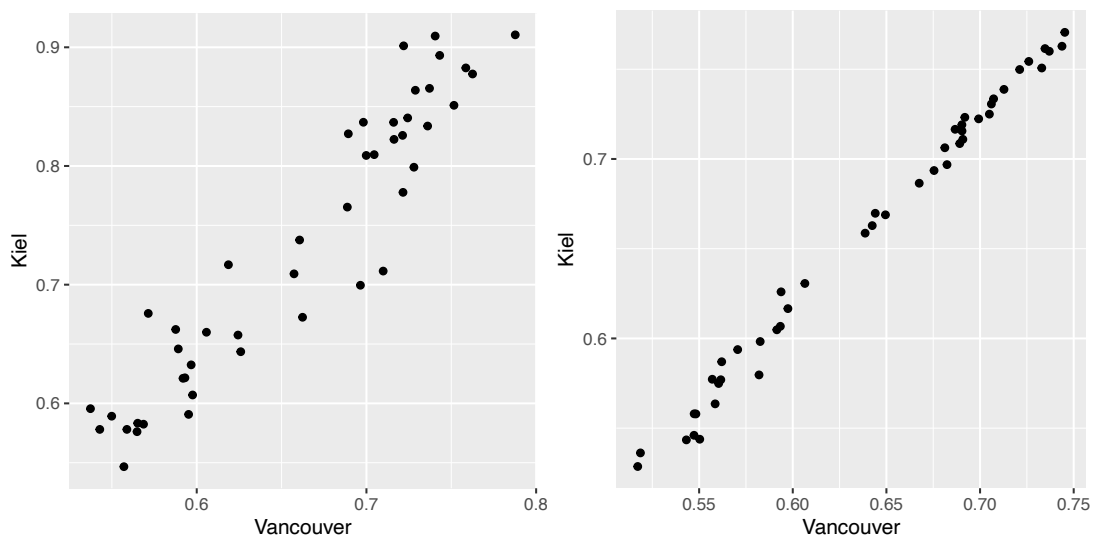

Supplementary Figure 4

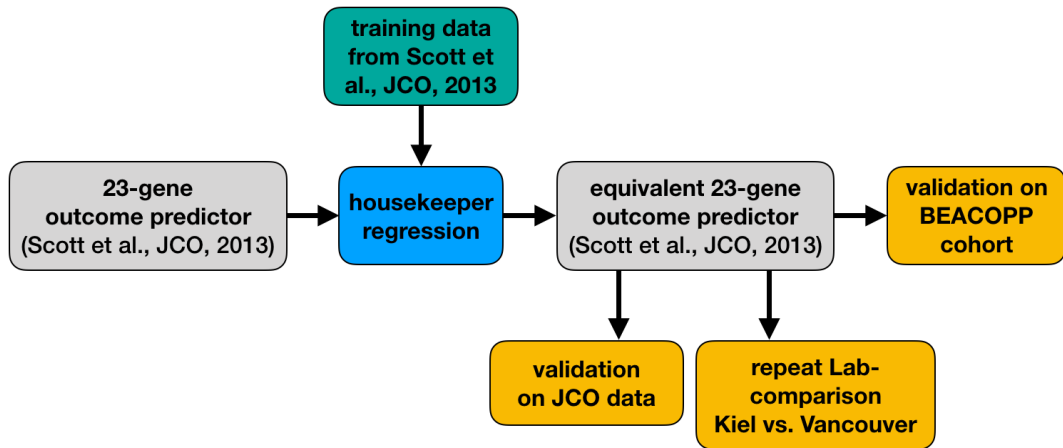

Supplementary Figure 5

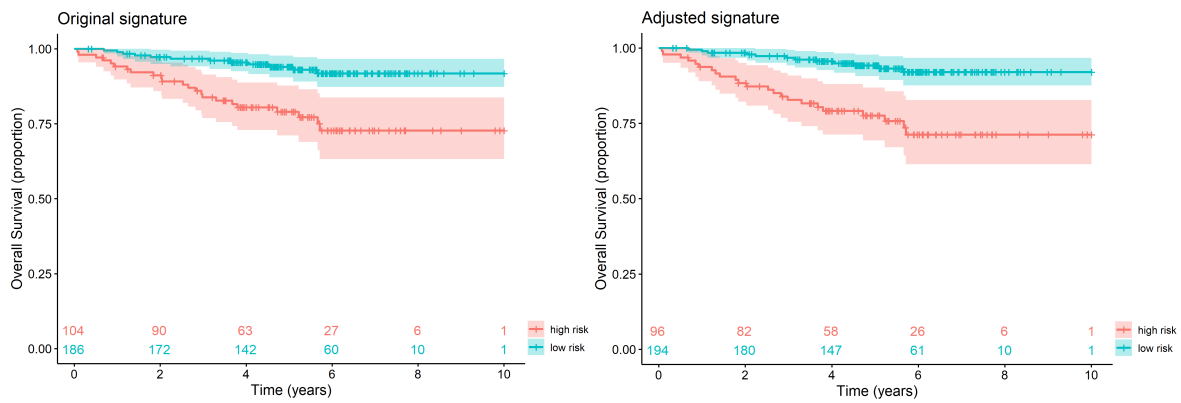

Supplementary Figure 6

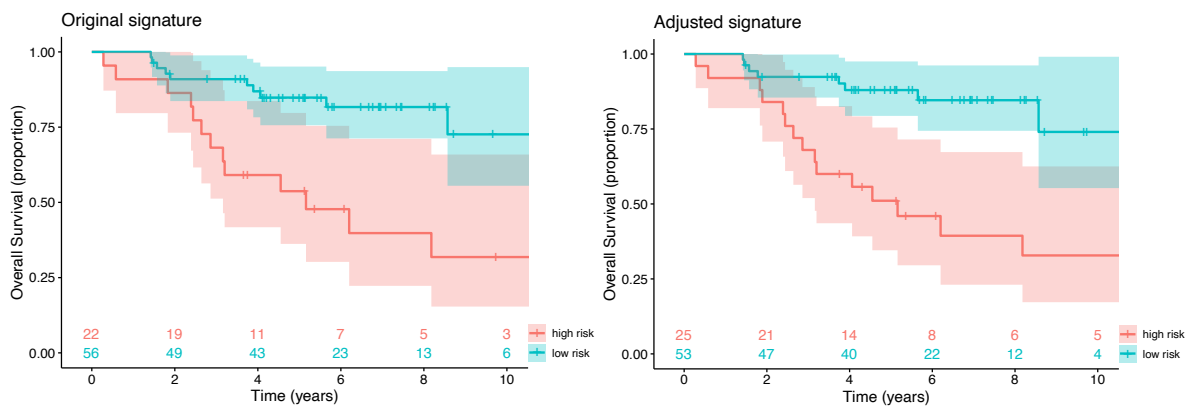

Supplementary Figure 7

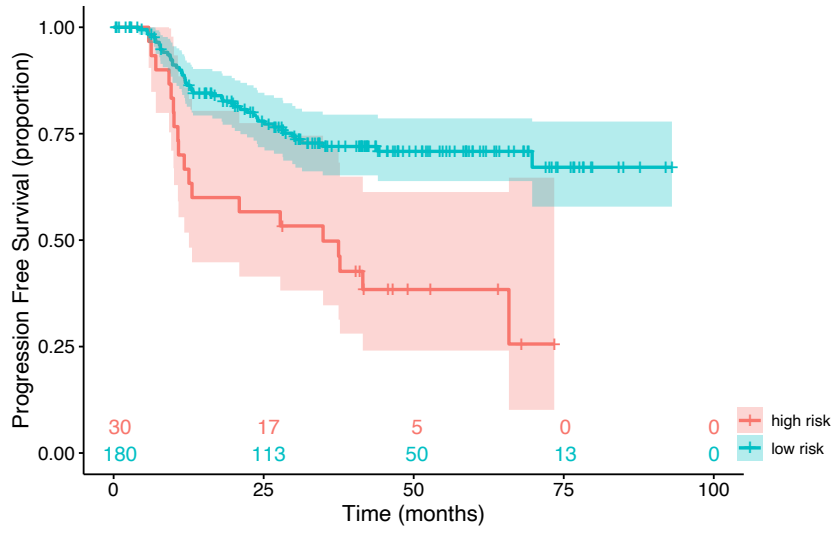

Supplementary Figure 8

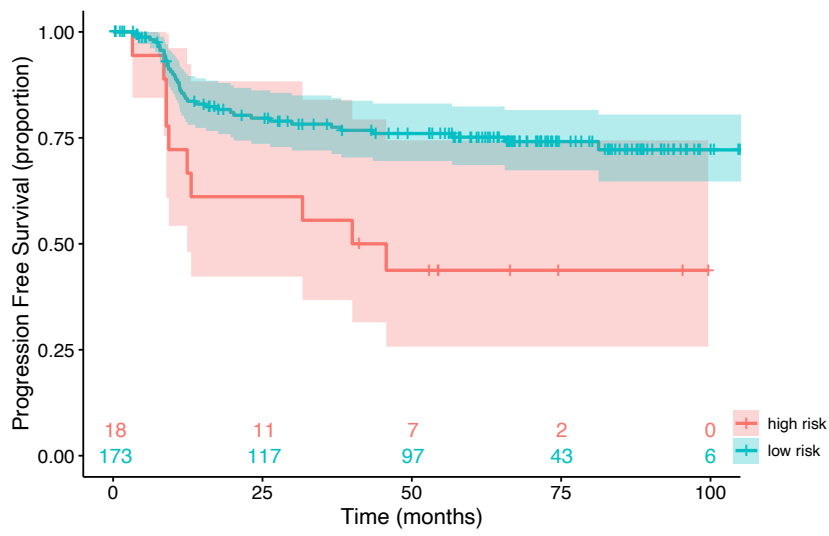

Supplement: 41375_2021_1314_MOESM2_ESM.pdf [file 41375_2021_1314_MOESM2_ESM.pdf]
